# Supplementary material
Source: Springer Nature journal article supplement (https://www.springermedizin.de/resource/supplementary/13058_2013_3425_MOESM3_ESM.pdf/9704096)

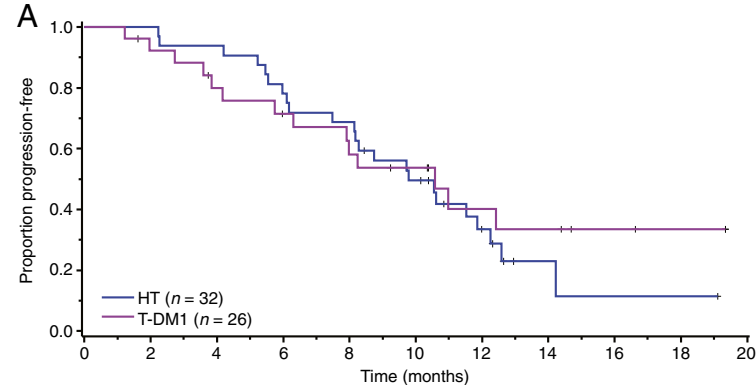

Number at risk

|       |    |    |    |    |    |    |   |   |   |   |   |
|-------|----|----|----|----|----|----|---|---|---|---|---|
| HT    | 32 | 32 | 30 | 25 | 22 | 15 | 7 | 2 | 1 | 1 | 0 |
| T-DM1 | 26 | 23 | 19 | 16 | 13 | 10 | 6 | 5 | 3 | 2 | 0 |

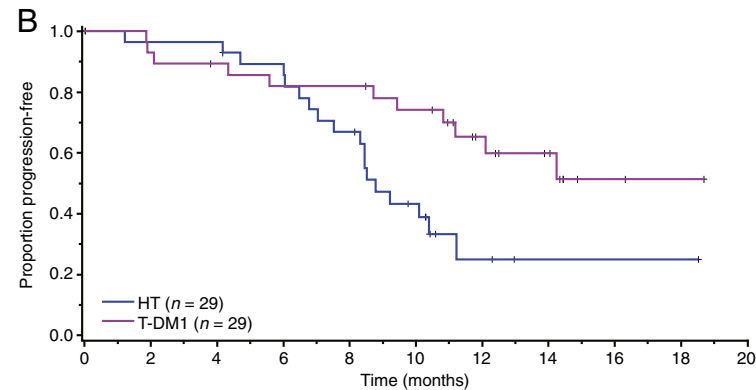

Number at risk

|       |    |    |    |    |    |    |    |   |   |   |   |
|-------|----|----|----|----|----|----|----|---|---|---|---|
| HT    | 29 | 27 | 27 | 24 | 18 | 10 | 3  | 1 | 1 | 1 | 0 |
| T-DM1 | 29 | 26 | 24 | 22 | 22 | 19 | 12 | 8 | 2 | 1 | 0 |

Supplement: MOESM3 [file 9704096]
